# Supplementary material for: Fabrication and electrocatalytic performance of highly stable and active platinum nanoparticles supported on nitrogen-doped ordered mesoporous carbons for oxygen reduction reaction
Source: Royal Society of Chemistry journal article supplement (doi:10.1039/c1jm11488c), 2011-01-01
Supplement: c1jm11488c.pdf [file c1jm11488c.pdf]

**Electronic Supplementary Information (ESI)**

**Fabrication and electrocatalytic performance of highly stable and active platinum nanoparticles supported on nitrogen-doped ordered mesoporous carbons for oxygen reduction reaction**

**Shou-Heng Liu,<sup>ab</sup> Min-Tsung Wu,<sup>ac</sup> Ying-Huang Lai,<sup>d</sup> Chien-Chang Chiang,<sup>ac</sup>  
Ningya Yu,<sup>ae</sup> and Shang-Bin Liu<sup>\*ac</sup>**

<sup>a</sup> *Institute of Atomic and Molecular Sciences, Academia Sinica, P.O. Box 23-166,  
Taipei 10617, Taiwan.*

<sup>b</sup> *Present Address: Department of Chemical and Materials Engineering, National  
Kaohsiung University of Applied Sciences, Kaohsiung 80778, Taiwan*

<sup>c</sup> *Department of Chemistry, National Taiwan Normal University, Taipei 11677, Taiwan*

<sup>d</sup> *Department of Chemistry, Tunghai University, Taichung 40704, Taiwan*

<sup>e</sup> *Present Address: Department of Chemistry and Chemical Engineering, Hunan  
Normal University, Changsha 40704, China*

\*To whom correspondence should be addressed:

Prof./Dr. Shang-Bin Liu: E-mail: sbliu@sinica.edu.tw; Fax: +886-2-23620200; Tel:  
+886-2-23668230

**Table S1** Physical properties of various SBA-15-N<sub>y</sub> samples

| Sample     | <i>y</i><br>(mol%) <sup>a</sup> | N content<br>(wt%) <sup>b</sup> | <i>S</i> <sub>BET</sub><br>(m <sup>2</sup> /g) <sup>c</sup> | <i>d</i><br>(nm) <sup>d</sup> | <i>V</i> <sub>Tot</sub><br>(cm <sup>3</sup> /g) <sup>e</sup> |
|------------|---------------------------------|---------------------------------|-------------------------------------------------------------|-------------------------------|--------------------------------------------------------------|
| SBA-15-N0  | 0                               | 0                               | 684                                                         | 8.0                           | 1.15                                                         |
| SBA-15-N10 | 10                              | 2.7                             | 487                                                         | 6.9                           | 0.81                                                         |
| SBA-15-N20 | 20                              | 3.8                             | 400                                                         | 6.7                           | 0.64                                                         |
| SBA-15-N30 | 30                              | 4.5                             | 126                                                         | 6.2                           | 0.28                                                         |
| SBA-15-N40 | 40                              | 5.5                             | 18                                                          | ND                            | 0.10                                                         |

<sup>a</sup>  $y = \text{TA}/(\text{TEOS} + \text{TA})$ .

<sup>b</sup> Nitrogen contents measured by elemental analysis.

<sup>c</sup> Brunauer–Emmet–Teller (BET) surface areas.

<sup>d</sup> Pore diameters derived by the Barrett–Joyner–Halenda (BJH) method using the adsorption branches.

<sup>e</sup> Total pore volumes calculated as the amount of N<sub>2</sub> adsorbed at a relative pressure of 0.99.

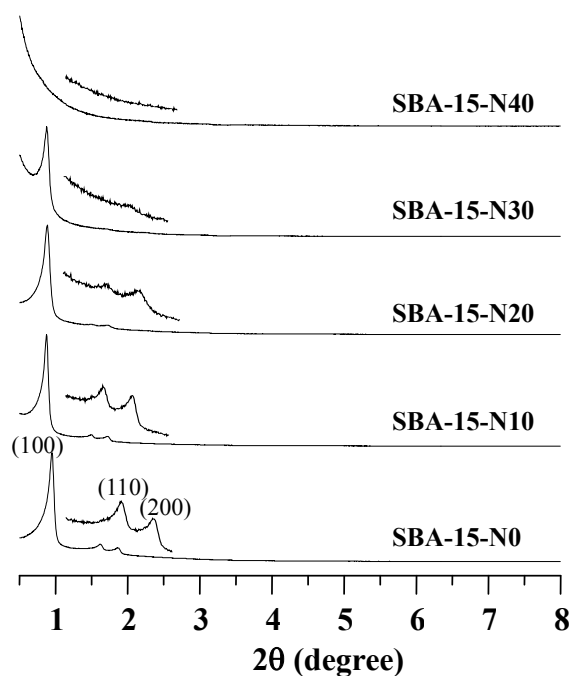

**Fig. S1** Small-angle powder XRD patterns of various SBA-15-N<sub>y</sub> samples.

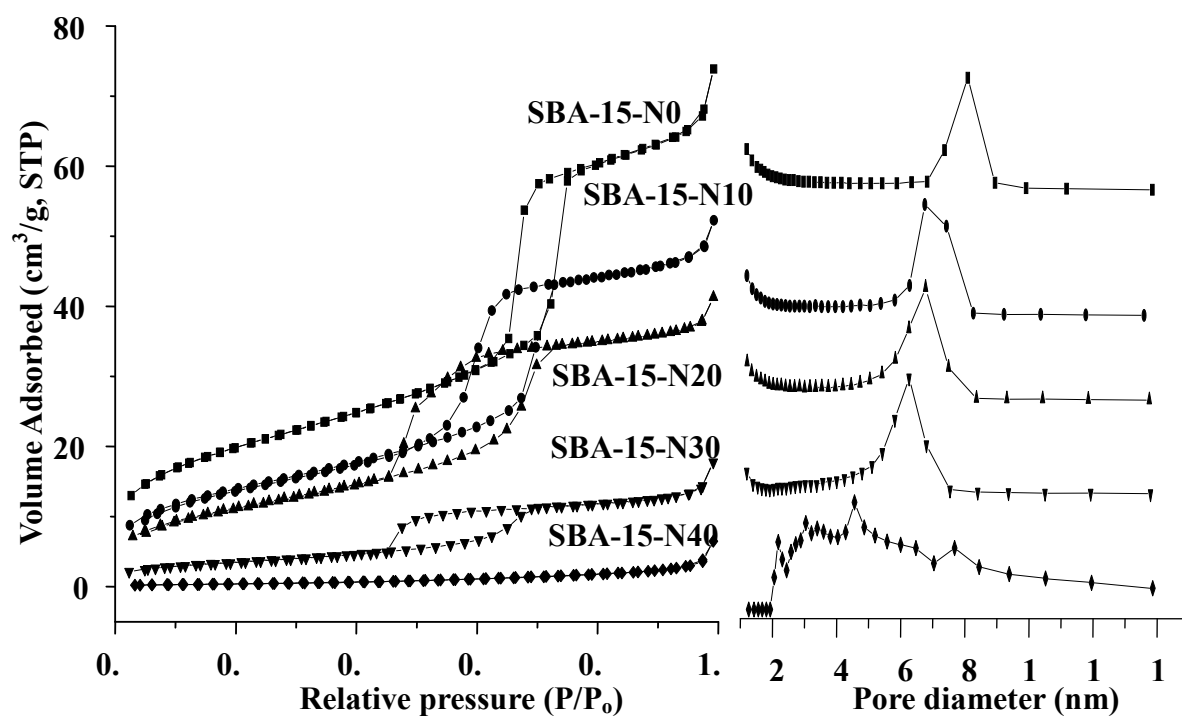

**Fig. S2** N<sub>2</sub> adsorption/desorption isotherms (left) and corresponding pore size distribution (right) of various SBA-15-N<sub>y</sub> samples.

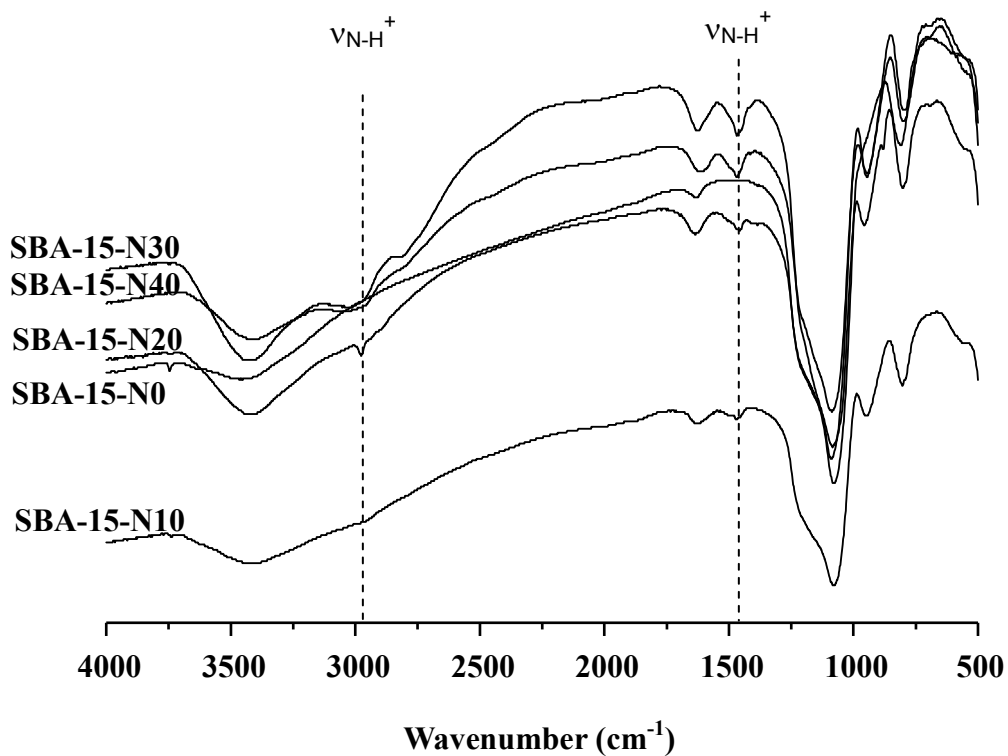

**Fig. S3** FTIR spectra of various SBA-15-N<sub>y</sub> samples.

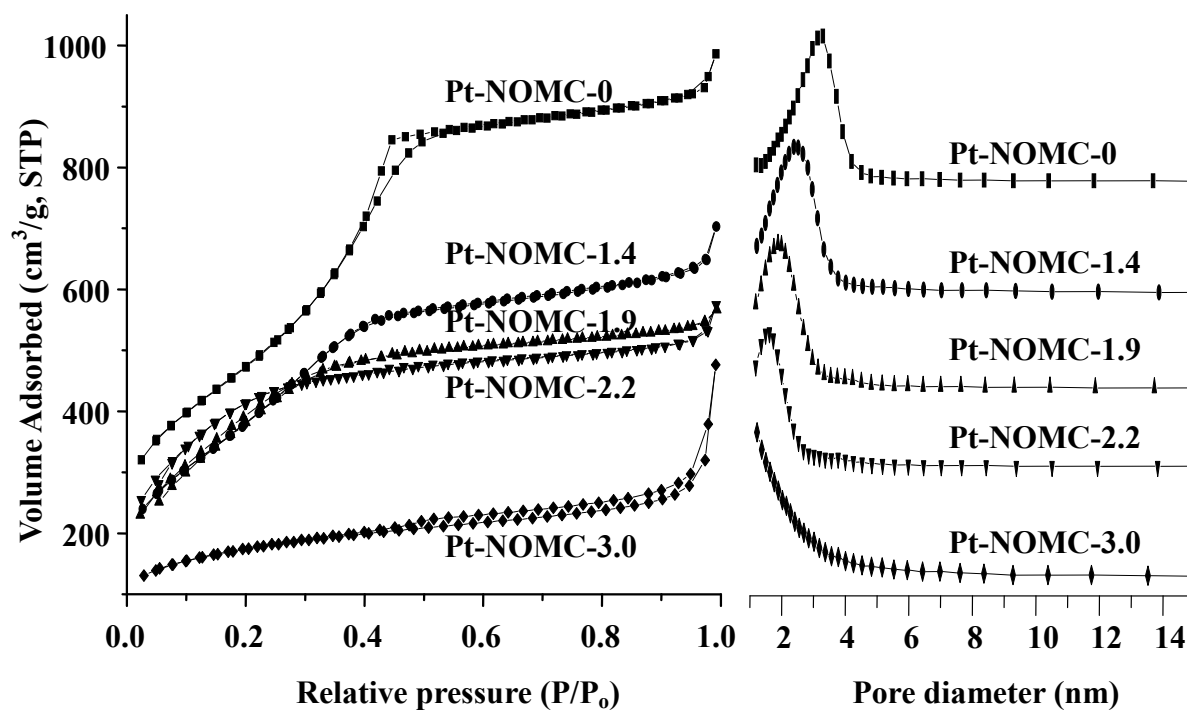

**Fig. S4** N<sub>2</sub> adsorption/desorption isotherms (left) and corresponding pore size distribution (right) of various Pt-NOMC-*x* samples.

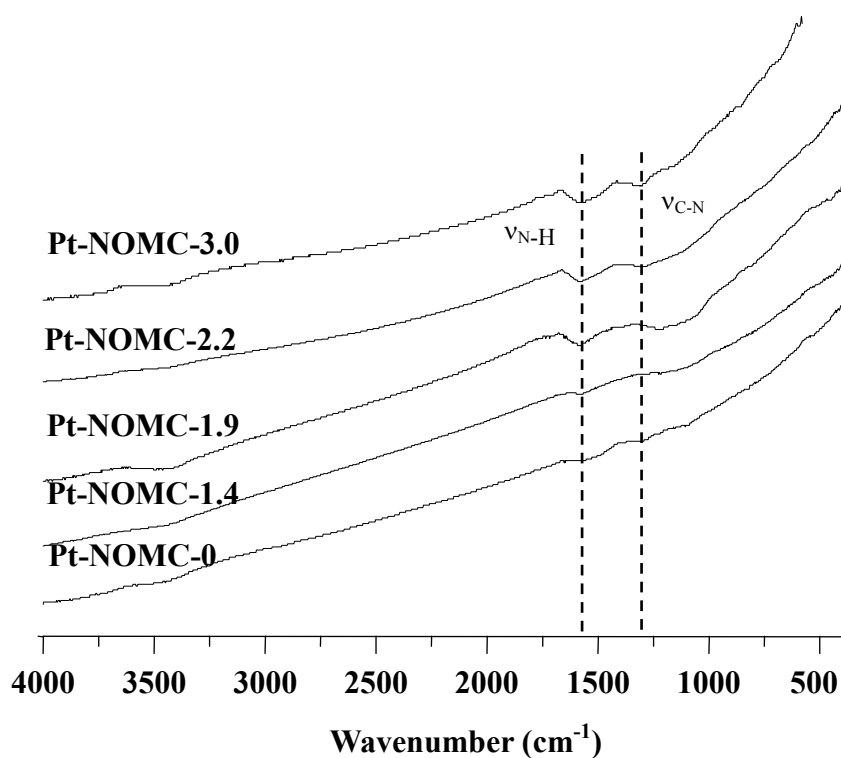

**Fig. S5** FTIR spectra of various Pt-NOMC-*x* samples.

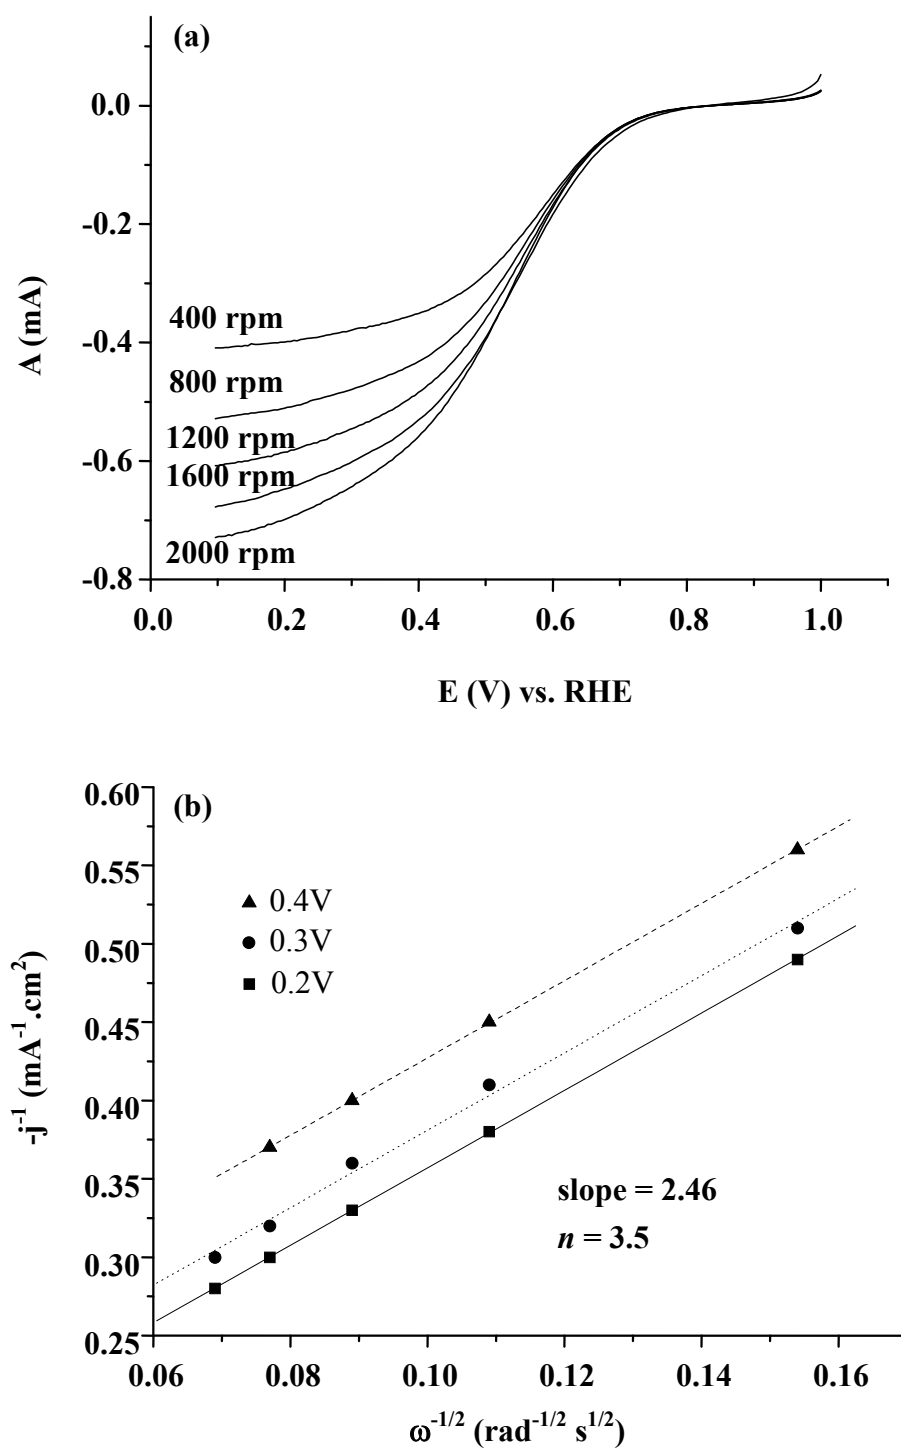

**Fig. S6** (a) Oxygen reduction reaction on Pt-NOMC-0 electrode in  $O_2$  saturated 0.1 M  $H_2SO_4$  solution at room temperature and different rotating rates and (b) the corresponding Koutecky-Levich plots at different potentials. The current densities were calculated by Eqs. 1-3 depicted in the main text.

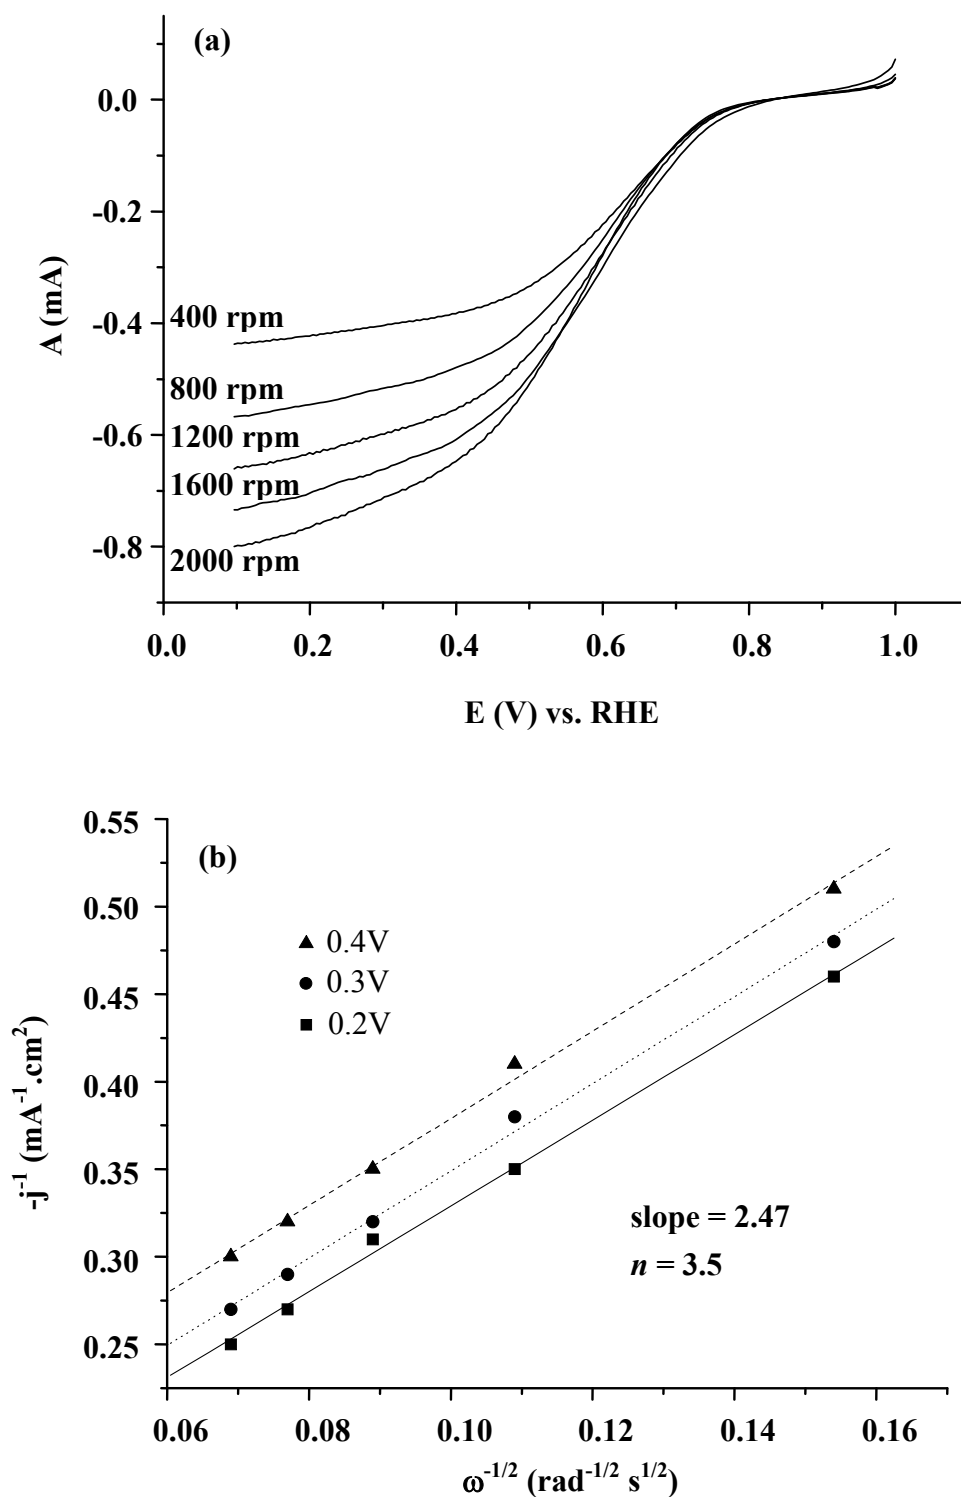

**Fig. S7** (a) Oxygen reduction reaction on Pt-NOMC-1.4 electrode in  $\text{O}_2$  saturated 0.1 M  $\text{H}_2\text{SO}_4$  solution at room temperature and different rotating rates and (b) the corresponding Koutecky-Levich plots at different potentials. The current densities were calculated by Eqs. 1-3 depicted in the main text.

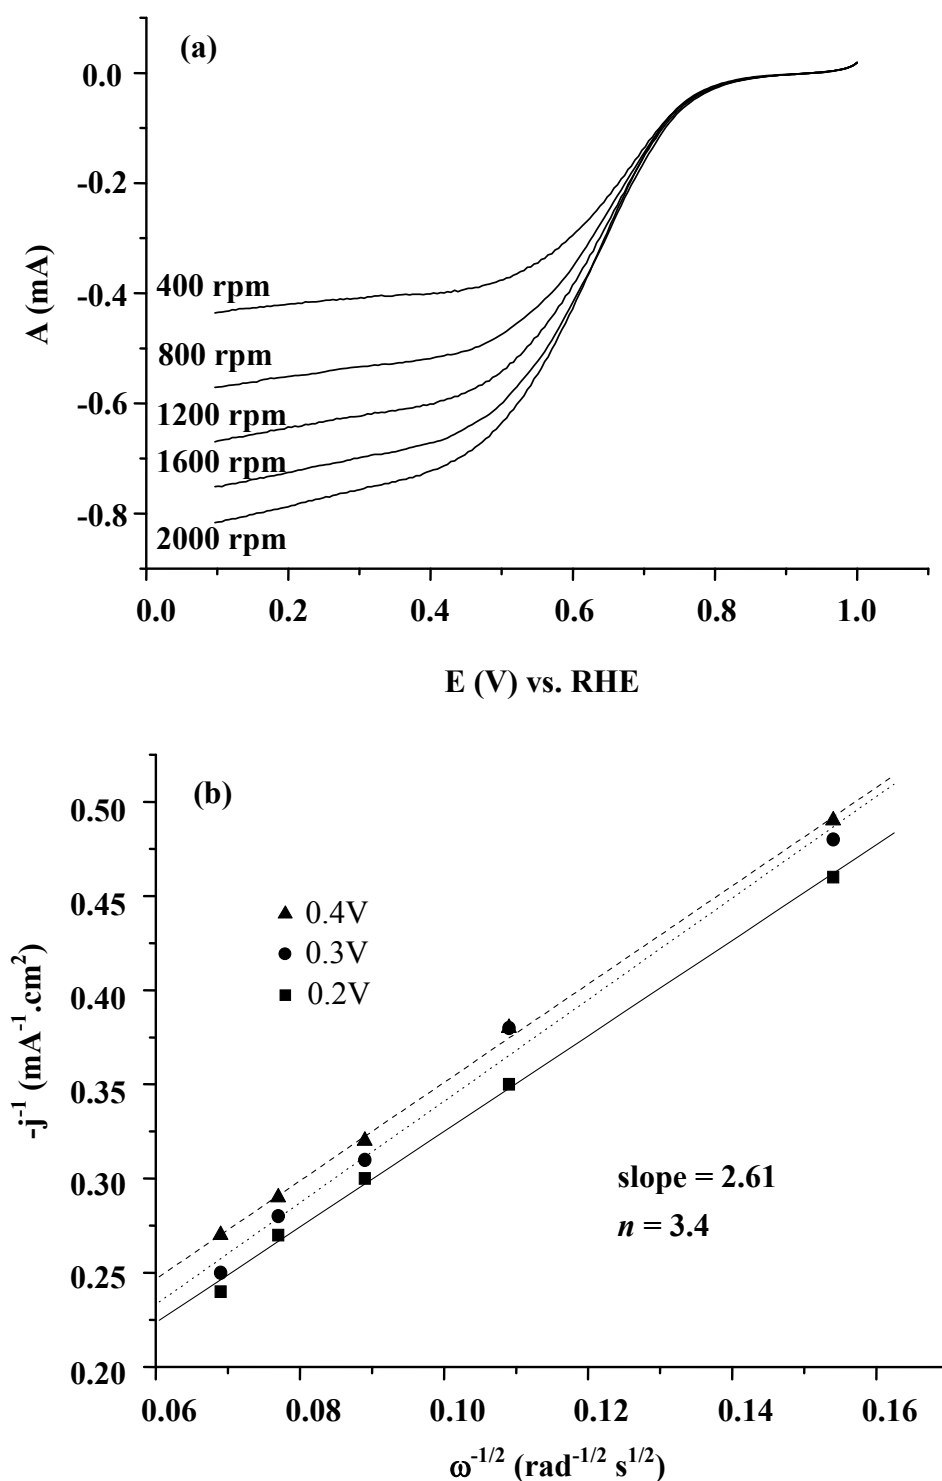

**Fig. S8** (a) Oxygen reduction reaction on Pt-NOMC-1.9 electrode in  $O_2$  saturated 0.1 M  $H_2SO_4$  solution at room temperature and different rotating rates and (b) the corresponding Koutecky-Levich plots at different potentials. The current densities were calculated by Eqs. 1-3 depicted in the main text.

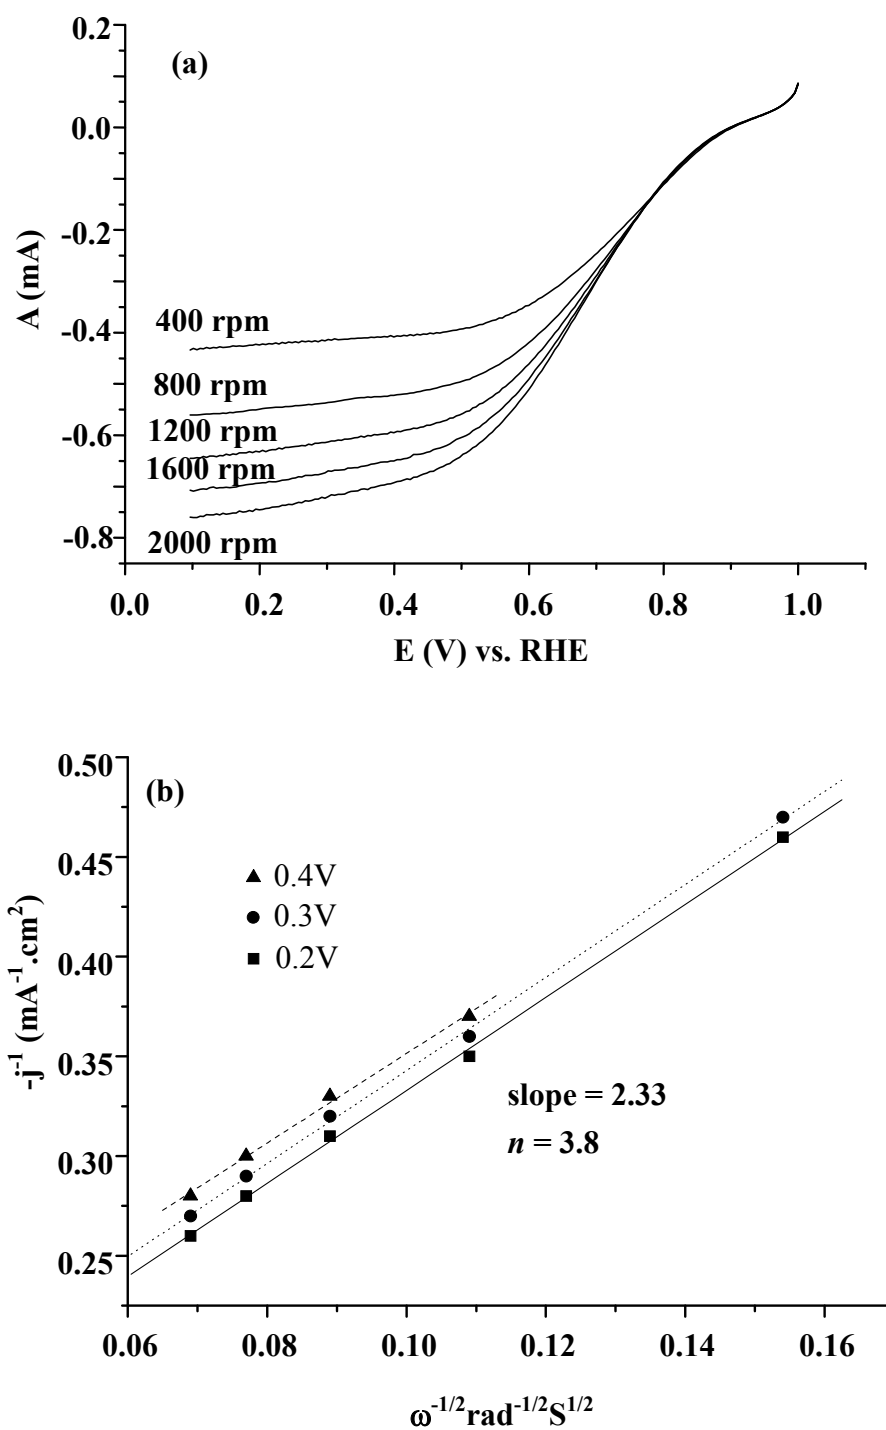

**Fig. S9** (a) Oxygen reduction reaction on Pt-NOMC-2.2 electrode in  $O_2$  saturated 0.1 M  $H_2SO_4$  solution at room temperature and different rotating rates and (b) the corresponding Koutecky-Levich plots at different potentials. The current densities were calculated by Eqs. 1-3 depicted in the main text.



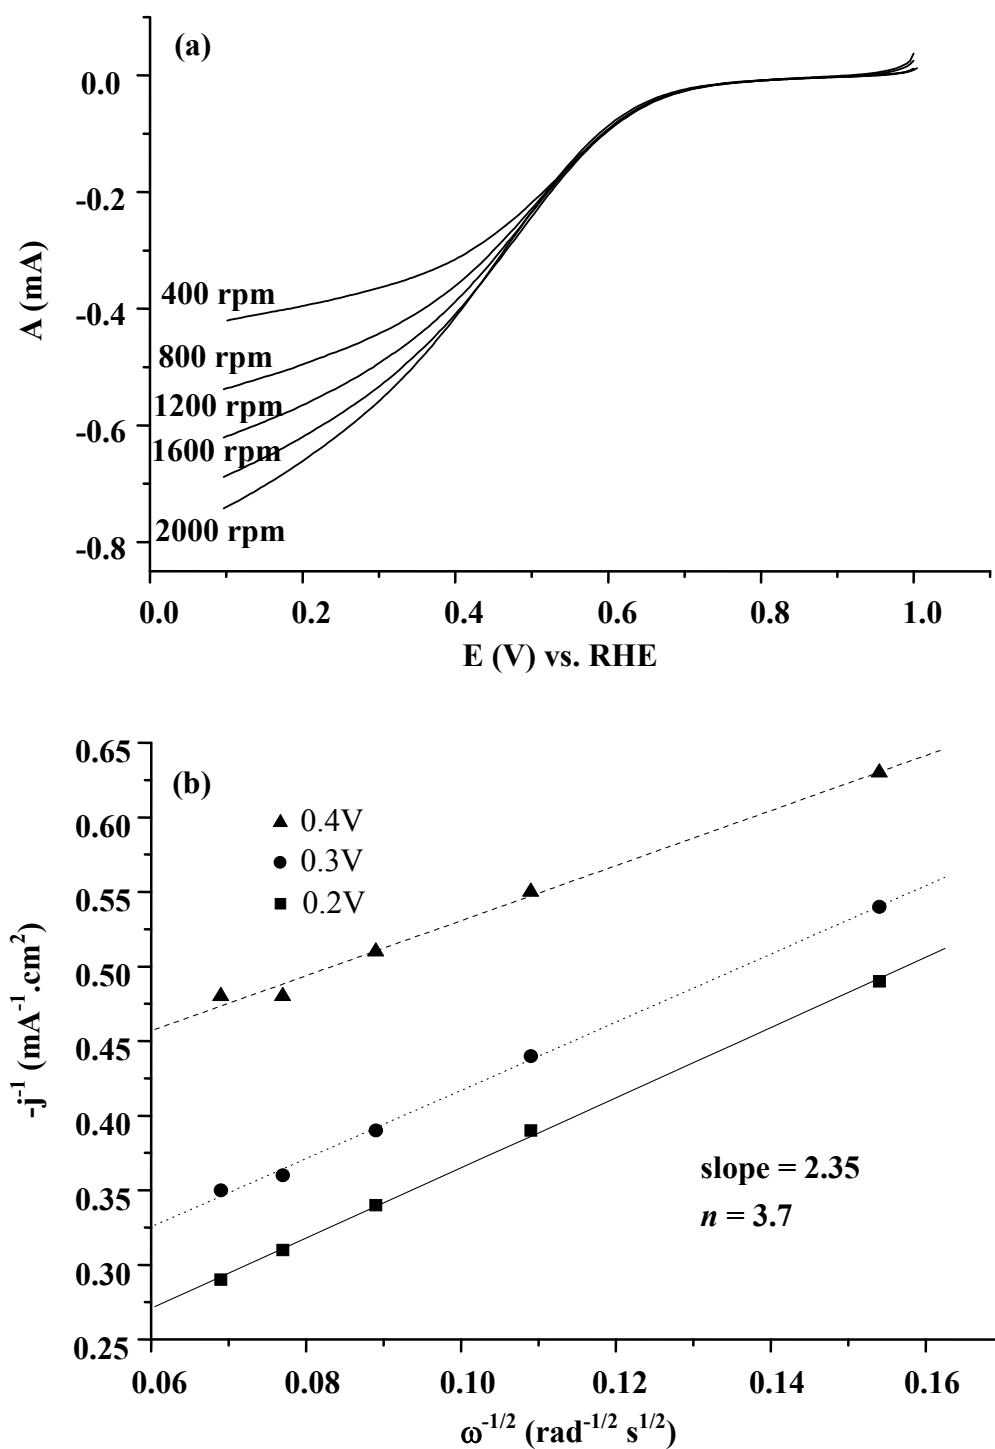

**Fig. S10** (a) Oxygen reduction reaction on Pt-NOMC-3.0 electrode in  $\text{O}_2$  saturated 0.1 M  $\text{H}_2\text{SO}_4$  solution at room temperature and different rotating rates and (b) the corresponding Koutecky-Levich plots at different potentials. The current densities were calculated by Eqs. 1-3 depicted in the main text.

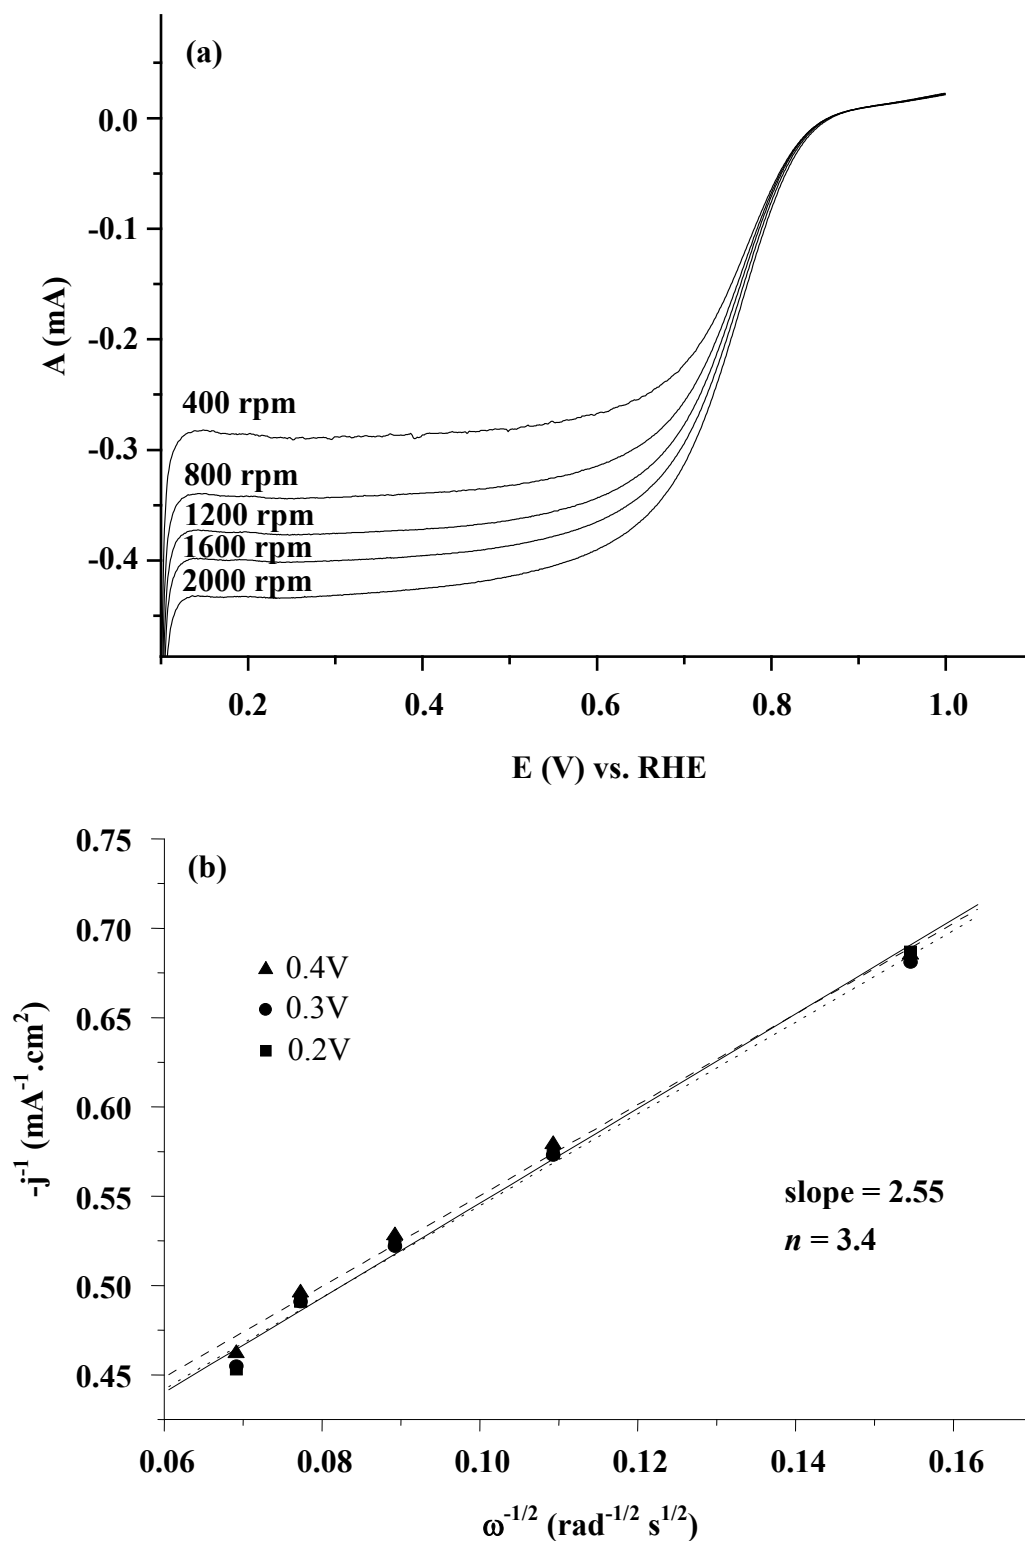

**Fig. S11** (a) Oxygen reduction reaction on JM-Pt/C electrode in O<sub>2</sub> saturated 0.1 M H<sub>2</sub>SO<sub>4</sub> solution at room temperature and different rotating rates and (b) the corresponding Koutecky-Levich plots at different potentials. The current densities were calculated by Eqs. 1-3 depicted in the main text.
